# Supplementary material for: Three metal complexes with a pyridyl Schiff base: cytotoxicity, migration and mechanism of apoptosis
Source: Royal Society of Chemistry journal article supplement (doi:10.1039/d2dt02413f), 2022-01-01
Supplement: d2dt02413f1.pdf [file d2dt02413f1.pdf]

## Electronic Supplementary Information

### Three metal complexes with a pyridyl schiff base: cytotoxicity, migration and mechanism of apoptosis

Feiya Zhou, Fangxin Gao, Qinghua Chang, Xianfeng Yang, Li-Li Liang\*

Department of Chemistry, Anhui Engineering Technology Research Center of  
Biochemical Pharmaceutical, Bengbu Medical College, Bengbu 233030, P. R. China.

E-mail address:

[cll2162@163.com](mailto:cll2162@163.com)

#### Contents:

1. **Table S1** Selected Bond Lengths (Å) and Bond Angles (°) in **1-3**
2. **TableS2** IC<sub>50</sub> values of different complexes
3. **FigureS1** Powder XRD patterns of **1-3**
4. **Figure S2** TG-DSC curves of **1-3**
5. **FigureS3** Ultraviolet spectrum of **1-3** in buffer solution
6. **FigureS4** Infrared spectroscopy of **1-3**

**Table S1** Selected Bond Lengths (Å) and Bond Angles (°) in **1-3**

| 1         |            |           |            |           |            |
|-----------|------------|-----------|------------|-----------|------------|
| Cu1—N2    | 1.942(3)   | Cu1—N7    | 1.994(3)   | Cu1—O3    | 2.288(3)   |
| Cu1—O1    | 1.957(3)   | Cu1—N4    | 2.039(3)   | Cu2—N6    | 1.939(3)   |
| Cu2—O2    | 1.974(3)   | Cu2—N8    | 2.060(4)   |           |            |
| Cu2—N3    | 2.014(3)   | Cu2—O6    | 2.236(3)   |           |            |
| N2—Cu1—O1 | 79.37(12)  | N2—Cu1—N7 | 158.68(13) | O1—Cu1—N7 | 95.06(12)  |
| N2—Cu1—N4 | 80.56(13)  | O1—Cu1—N4 | 159.63(13) | N7—Cu1—N4 | 104.95(13) |
| N2—Cu1—O3 | 98.25(12)  | O1—Cu1—O3 | 90.17(11)  | N7—Cu1—O3 | 102.37(12) |
| N4—Cu1—O3 | 89.25(11)  | N6—Cu2—O2 | 78.57(12)  | N6—Cu2—N3 | 154.78(14) |
| O2—Cu2—N3 | 94.75(12)  | N6—Cu2—N8 | 80.33(13)  | O2—Cu2—N8 | 158.79(11) |
| N3—Cu2—N8 | 105.30(13) | N6—Cu2—O6 | 122.81(12) | O2—Cu2—O6 | 102.29(11) |
| N3—Cu2—O6 | 82.30(11)  | N8—Cu2—O6 | 87.43(12)  |           |            |

  

| 2         |           |           |           |           |           |
|-----------|-----------|-----------|-----------|-----------|-----------|
| Cd1—N3    | 2.288(2)  | Cd1—O5    | 2.341(2)  | Cd1—N4    | 2.349(3)  |
| Cd1—O2    | 2.381(2)  | Cd1—N2    | 2.410(2)  | Cd1—O6    | 2.456(2)  |
| Cd1—O3    | 2.631(2)  |           |           |           |           |
| N3—Cd1—O5 | 136.28(8) | N3—Cd1—N4 | 112.47(9) | O5—Cd1—N4 | 106.16(8) |
| N3—Cd1—O2 | 81.55(8)  | O5—Cd1—O2 | 120.63(8) | N4—Cd1—O2 | 87.40(8)  |
| N3—Cd1—N2 | 89.61(8)  | O5—Cd1—N2 | 84.96(8)  | N4—Cd1—N2 | 69.85(8)  |
| O2—Cd1—N2 | 150.32(8) | N3—Cd1—O6 | 96.22(8)  | O5—Cd1—O6 | 53.94(8)  |
| N4—Cd1—O6 | 148.90(8) | O2—Cd1—O6 | 85.12(8)  | N2—Cd1—O6 | 124.15(8) |
| N3—Cd1—O3 | 130.61(8) | O5—Cd1—O3 | 74.33(7)  | N4—Cd1—O3 | 80.83(8)  |
| O2—Cd1—O3 | 50.66(7)  | N2—Cd1—O3 | 137.62(8) | O6—Cd1—O3 | 71.12(7)  |

  

| 3          |            |            |            |           |            |
|------------|------------|------------|------------|-----------|------------|
| Eu1—O1     | 2.373(3)   | Eu1—O9'    | 2.394(3)   | Eu1—O9    | 2.394(3)   |
| Eu1—O8     | 2.394(3)   | Eu1—O2     | 2.454(3)   | Eu1—O6    | 2.494(3)   |
| Eu1—N2     | 2.512(4)   | Eu1—O3     | 2.533(3)   | Eu1—O5    | 2.537(3)   |
| Eu1—N4     | 2.606(4)   | Eu1—N5     | 2.916(4)   | Eu1—N6    | 2.953(4)   |
| Eu1—H9A    | 2.8102     |            |            |           |            |
| O1—Eu1—O9' | 87.63(11)  | O1—Eu1—O9  | 87.63(11)  | O1—Eu1—O8 | 150.76(11) |
| O9'—Eu1—O8 | 81.47(11)  | O9—Eu1—O8  | 81.47(11)  | O1—Eu1—O2 | 79.42(11)  |
| O9'—Eu1—O2 | 148.87(11) | O9—Eu1—O2  | 148.87(11) | O8—Eu1—O2 | 122.11(11) |
| O1—Eu1—O6  | 82.86(10)  | O9'—Eu1—O6 | 126.26(11) | O9—Eu1—O6 | 126.26(11) |
| O8—Eu1—O6  | 81.97(11)  | O2—Eu1—O6  | 80.33(11)  | O1—Eu1—N2 | 62.80(11)  |
| O9'—Eu1—N2 | 77.48(11)  | O9—Eu1—N2  | 77.48(11)  | O6—Eu1—N2 | 138.47(11) |
| O8—Eu1—N2  | 138.97(12) | O2—Eu1—N2  | 71.41(12)  | O1—Eu1—O3 | 125.84(11) |
| O9'—Eu1—O3 | 146.21(11) | O9—Eu1—O3  | 146.21(11) | O8—Eu1—O3 | 70.75(11)  |
| O2—Eu1—O3  | 51.41(11)  | O6—Eu1—O3  | 69.32(11)  | N2—Eu1—O3 | 111.46(11) |
| O1—Eu1—O5  | 73.72(10)  | O9'—Eu1—O5 | 75.43(11)  | O9—Eu1—O5 | 75.43(11)  |
| O8—Eu1—O5  | 77.30(11)  | O2—Eu1—O5  | 126.23(11) | O6—Eu1—O5 | 51.10(10)  |
| N2—Eu1—O5  | 129.06(11) | O3—Eu1—O5  | 115.10(11) | O1—Eu1—N4 | 125.97(11) |
| O9'—Eu1—N4 | 83.01(12)  | O9—Eu1—N4  | 83.01(12)  | O8—Eu1—N4 | 79.66(11)  |
| O2—Eu1—N4  | 82.05(12)  | O6—Eu1—N4  | 142.29(11) | N2—Eu1—N4 | 63.21(12)  |
| O3—Eu1—N4  | 73.60(12)  | O5—Eu1—N4  | 150.39(11) | O1—Eu1—N5 | 103.09(11) |
| O9'—Eu1—N5 | 159.30(11) | O9—Eu1—N5  | 159.30(11) | O8—Eu1—N5 | 96.25(11)  |

|            |            |            |            |            |            |
|------------|------------|------------|------------|------------|------------|
| O2—Eu1—N5  | 25.88(11)  | O6—Eu1—N5  | 73.26(10)  | N2—Eu1—N5  | 91.57(11)  |
| O3—Eu1—N5  | 25.53(11)  | O5—Eu1—N5  | 124.35(10) | N4—Eu1—N5  | 76.36(12)  |
| O1—Eu1—N6  | 77.13(10)  | O9'—Eu1—N6 | 100.45(11) | O9—Eu1—N6  | 100.45(11) |
| O8—Eu1—N6  | 78.30(11)  | O2—Eu1—N6  | 103.99(11) | O6—Eu1—N6  | 25.95(10)  |
| N2—Eu1—N6  | 139.90(11) | O3—Eu1—N6  | 92.54(11)  | O5—Eu1—N6  | 25.15(10)  |
| N4—Eu1—N6  | 156.88(11) | N5—Eu1—N6  | 99.20(11)  | O1—Eu1—H9A | 71.6       |
| O9—Eu1—H9A | 16.4       | O8—Eu1—H9A | 94.2       | O2—Eu1—H9A | 142.1      |
| O6—Eu1—H9A | 118.6      | N2—Eu1—H9A | 73.8       | O3—Eu1—H9A | 162.5      |
| O5—Eu1—H9A | 68.2       | N4—Eu1—H9A | 95.5       | N5—Eu1—H9A | 165.3      |
| N6—Eu1—H9A | 93         |            |            |            |            |

**Table S2** IC<sub>50</sub> values of different complexes

| Metal                                                     | complex                                                    | parameter                | value                    | cell line  | Ref      |    |
|-----------------------------------------------------------|------------------------------------------------------------|--------------------------|--------------------------|------------|----------|----|
| Cd                                                        | Cd                                                         | IC <sub>50</sub> (μM)    | 36.91±0.47 ,             | A549 ,     | 1        |    |
|                                                           |                                                            |                          | 23.01±1.28 ,             | MCF-7      |          |    |
|                                                           |                                                            |                          | 36.96±0.75 ,             | HT29       |          |    |
|                                                           | Cd                                                         | Cd                       | IC <sub>50</sub> (μg/μL) | 4.55       | HT116    | 2  |
|                                                           |                                                            |                          |                          | 1.45       | HepG-2   |    |
|                                                           | Cd                                                         | Cd                       | ID <sub>50</sub> (μg/mL) | 12         | ADLD     | 3  |
| 15                                                        |                                                            |                          |                          | HeLa       |          |    |
|                                                           | [Cd(L)Cl <sub>2</sub> (H <sub>2</sub> O)]                  | IC <sub>50</sub> (μM)    | 410±31                   | A549       | 4        |    |
|                                                           | [CdL(CH <sub>3</sub> COO)(H <sub>2</sub> O <sub>2</sub> )] | IC <sub>50</sub> (μM)    | 0.3485                   | HepG2      | 5        |    |
|                                                           |                                                            |                          | 0.3369                   | MCF-7      |          |    |
| Eu                                                        | EuL <sub>2</sub> (H <sub>2</sub> O)·4H <sub>2</sub> O      | IC <sub>50</sub> (μM)    | 45.85                    | HeLa       | 6        |    |
|                                                           |                                                            |                          | 44.37                    | HCT116     |          |    |
|                                                           | complex 2                                                  | IC <sub>50</sub> (μM)    | 27.36±3.02               | HeLa       | 7        |    |
|                                                           | 6                                                          |                          | IC <sub>50</sub> (μM)    | 50.22±1.00 | BEL-7402 | 8  |
| >100                                                      |                                                            |                          |                          | NCL-H460   |          |    |
| 41.77±2.42                                                |                                                            |                          |                          | MGC80-3    |          |    |
| >100                                                      |                                                            |                          |                          | Hep-G2     |          |    |
| Cu                                                        | Cu(Cl <sub>2</sub> -L <sub>1</sub> )NO <sub>3</sub>        | IC <sub>50</sub> (μM)    | 61.48±1.94               | HeLa       | 9        |    |
|                                                           |                                                            |                          | >100                     | T-24       |          |    |
|                                                           |                                                            |                          | 18.1±1.78                | HCT116     |          |    |
|                                                           | 1                                                          |                          | IC <sub>50</sub> (μM)    | 4.2±2.2    | A2780    | 10 |
|                                                           |                                                            |                          |                          | 29.9±6.86  | MCF7     |    |
|                                                           |                                                            |                          |                          | 60.00±0.29 | A549     |    |
| [Cu(btacn) <sub>2</sub> ](ClO <sub>4</sub> ) <sub>2</sub> |                                                            | IC <sub>50</sub> (μM)    | 25.00±1.17               | MCF-7      | 11       |    |
|                                                           |                                                            |                          | 30.00±0.58               | HeLa       |          |    |
| ATRs-Cu                                                   |                                                            | IC <sub>50</sub> (μg/mL) | 5.17±0.39                | HeLa       | 12       |    |
|                                                           |                                                            |                          | 2.28±0.44                | HepG-2     |          |    |
|                                                           |                                                            |                          | 14.20                    | HepG-2     | 12       |    |
|                                                           |                                                            |                          | 6.10                     | HCT116     |          |    |

|   |                       |           |      |    |
|---|-----------------------|-----------|------|----|
| 1 | IC <sub>50</sub> (μM) | 53.52±6.4 | A549 | 13 |
|---|-----------------------|-----------|------|----|

Ref 1 Ligand: 2,6-bis(2-benzimidazolyl)pyridine

Ref 2 Ligand:(ahpv), where ahp = 2-amino-3-hydrox-ypyridine and v = 3-methoxysalicylaldehyde (o-vanillin)

Ref 3 Ligand:2,6-bis[1-(4-amino-1,2,3,6-tetra-hydro-1,3-dimethyl-2,6-dioxopyrimidin-5-yl)imino]eth-ylpyridine

Ref 4 Ligand:(N-[(phenylcarbamothioyl)amino]pyridine-3-carboxamide)

Ref 5 Ligand:(Z)-(2-((1,3-diphenyl-1H-pyrazol-4-yl)methylene)-hydrazinyl)(pyridin-2-ylamino)methanethiol

Ref 6 Ligand:derived from glycyglycine and 4-nitrobenzaldehyde

Ref 7 Ligand:1,10(1,4-phenylene-bis [methylene])-bis (pyridine-3-carboxylic acid)

Ref 8 Ligand:2-((2-(pyridin-2-yl) hydrazono)methyl)quinolin-8-ol

Ref 9 Ligand:

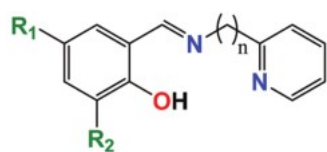

(R<sub>1</sub>=R<sub>2</sub>=Cl)

Ref 10 Ligand: 5-[(pyridin-2-ylmethylene)-amino]-pentan-1-ol)

Ref 11 Ligand: 1,4,7-triazacyclononane-derivative,4-benzyloxy-benzyl-1,4,7-triazacyclononane

Ref 12 Ligand: [4-bromo-2-(thiazole-2-yliminomethyl) phenol]

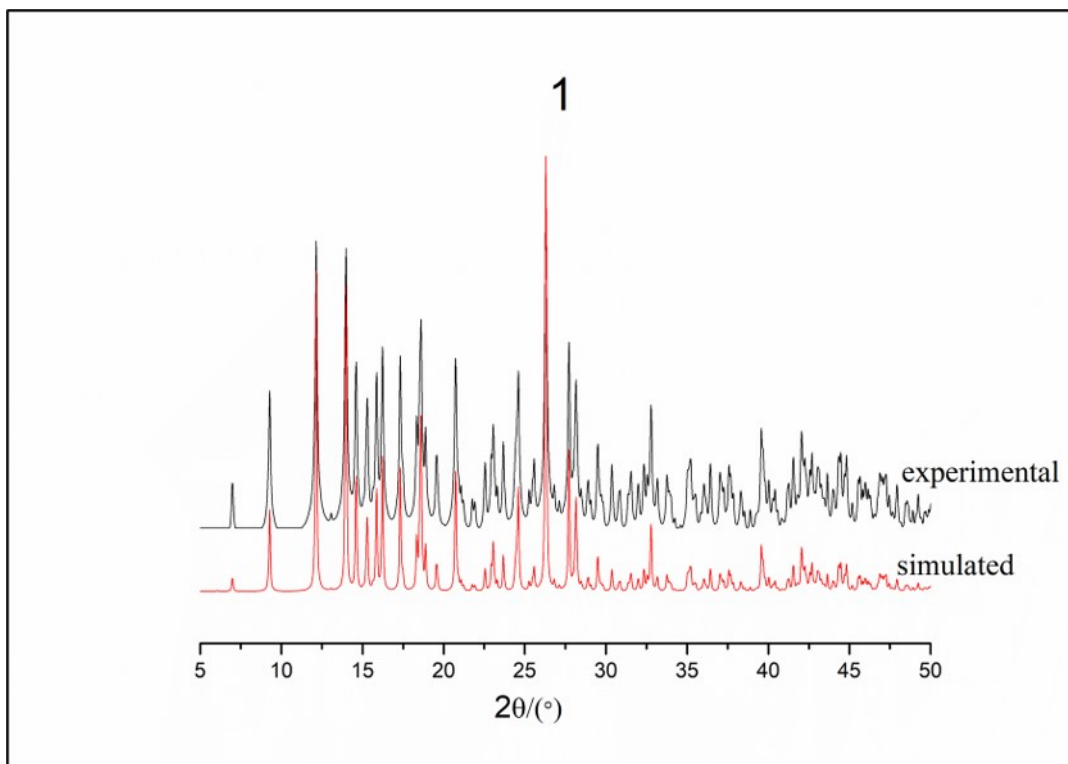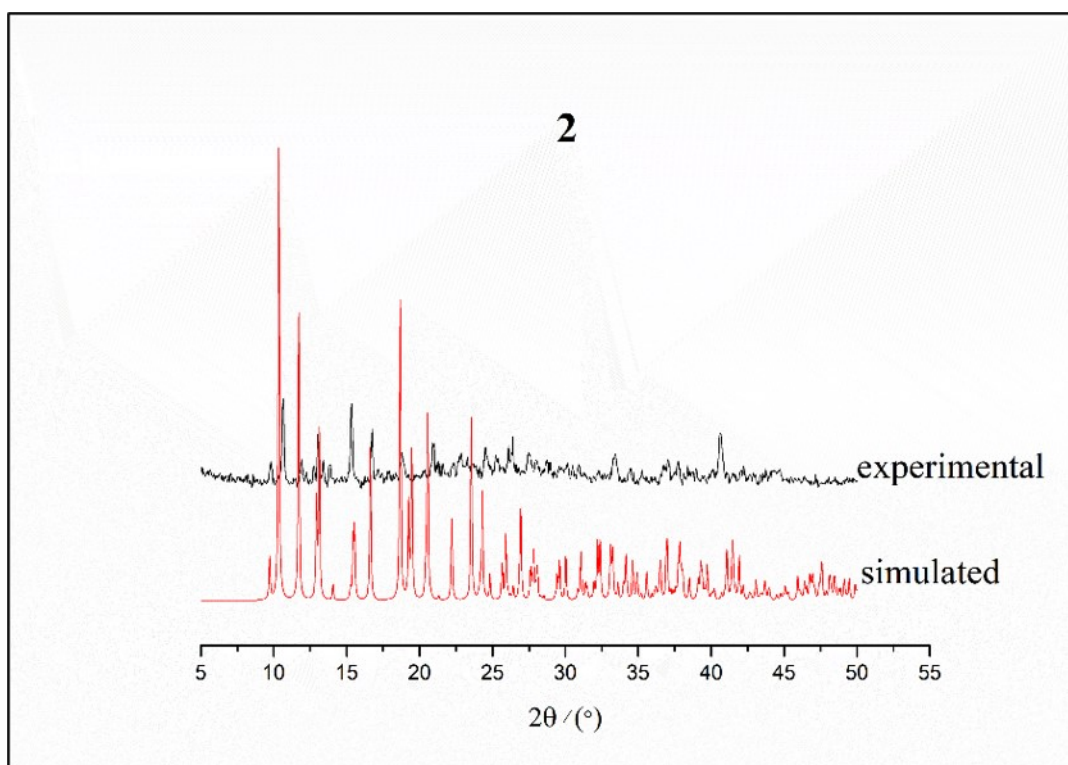

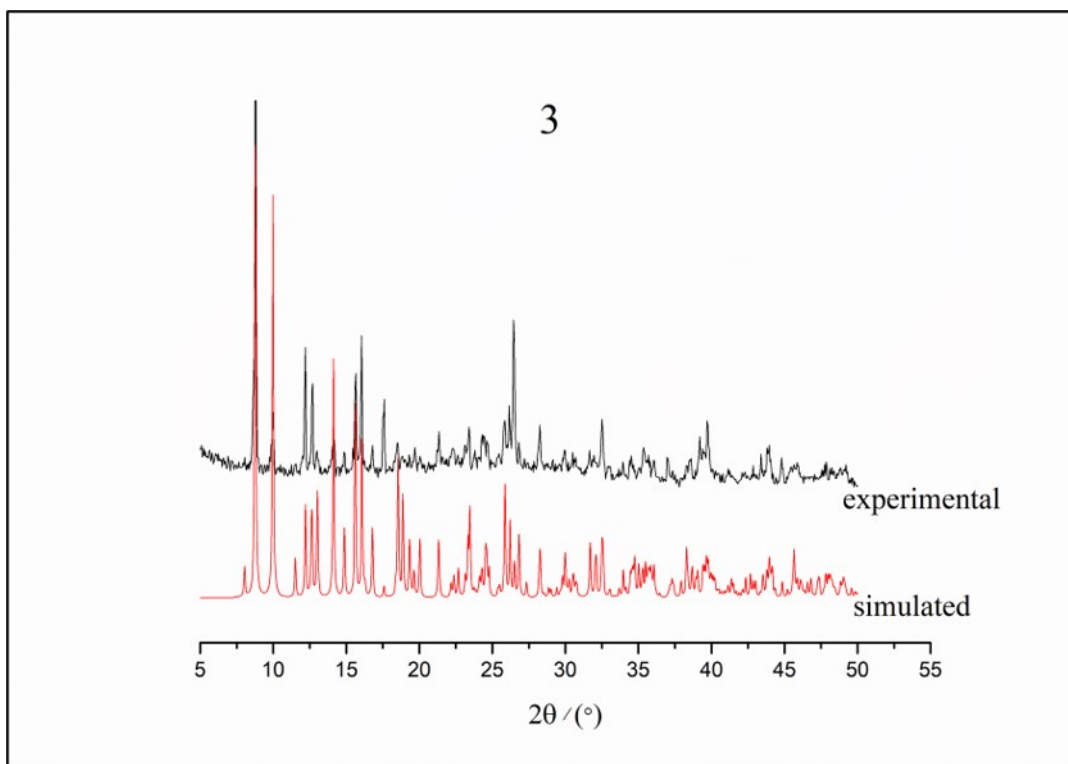

Figure S1 Powder XRD patterns of 1-3

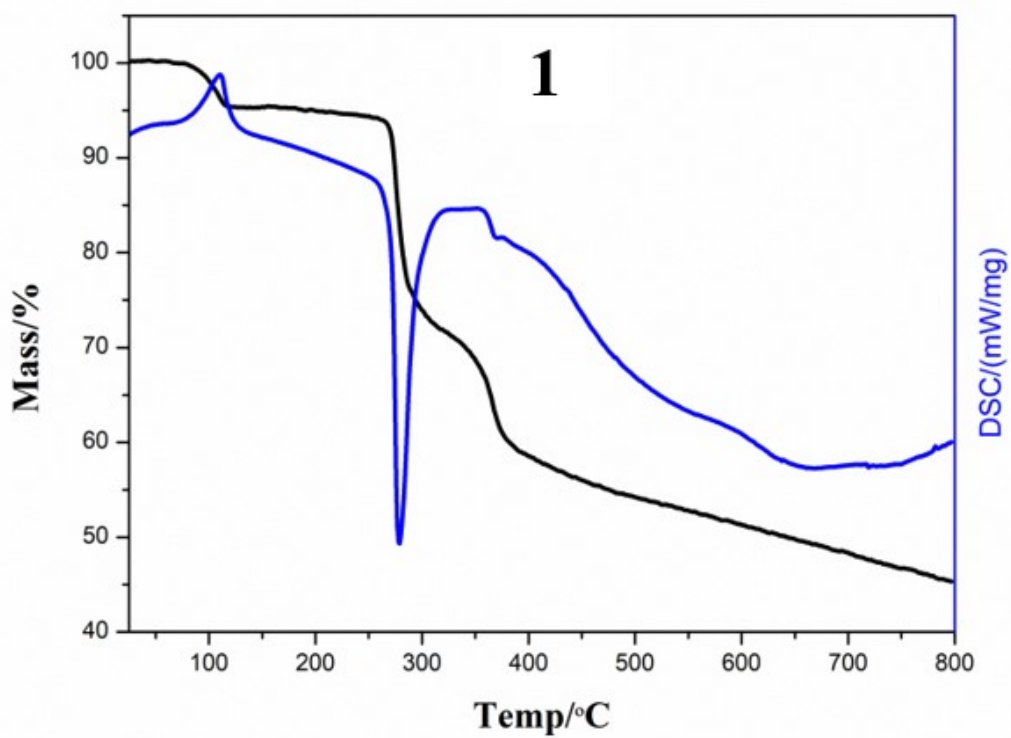

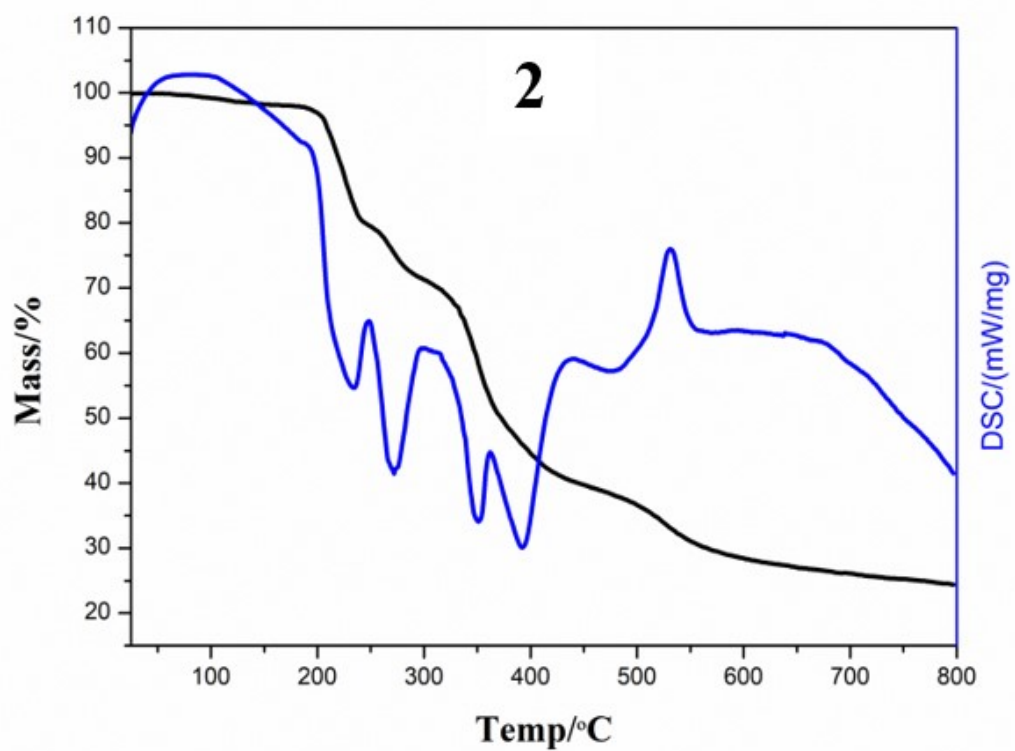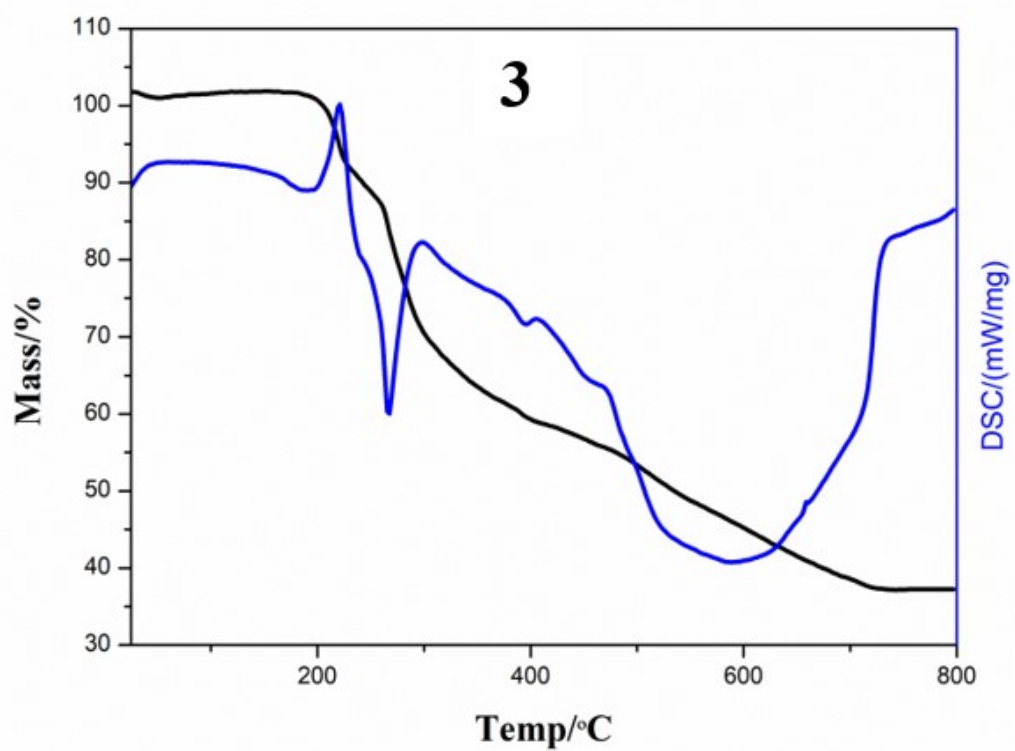

Figure S2 TG-DSC curves of 1-3

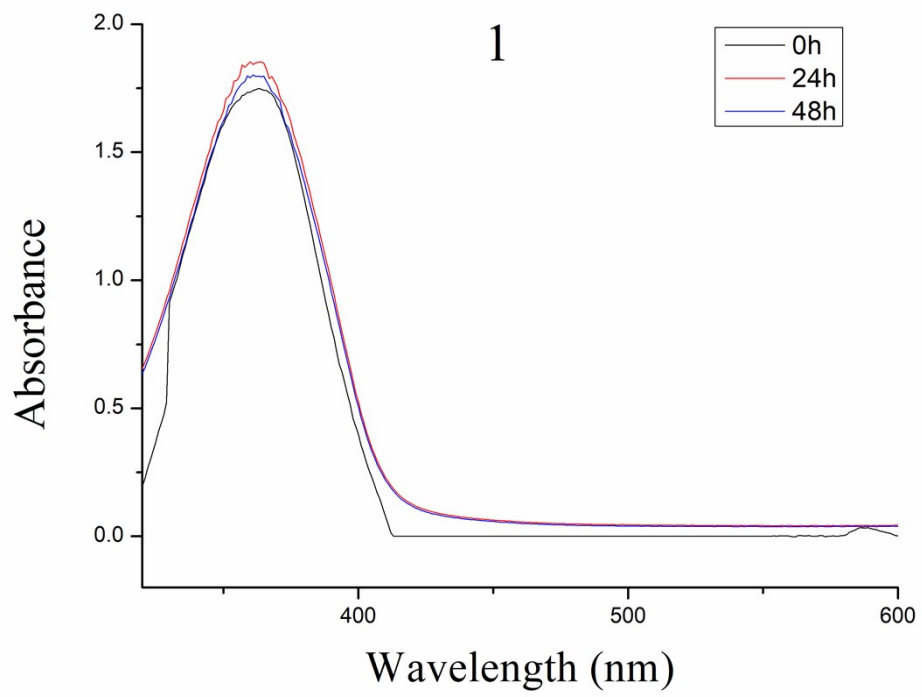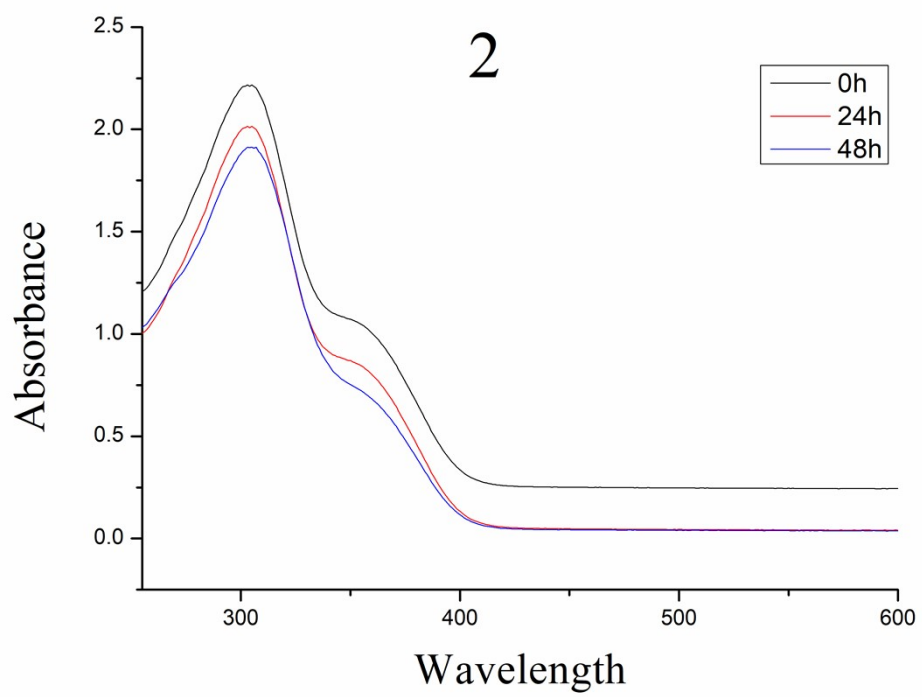



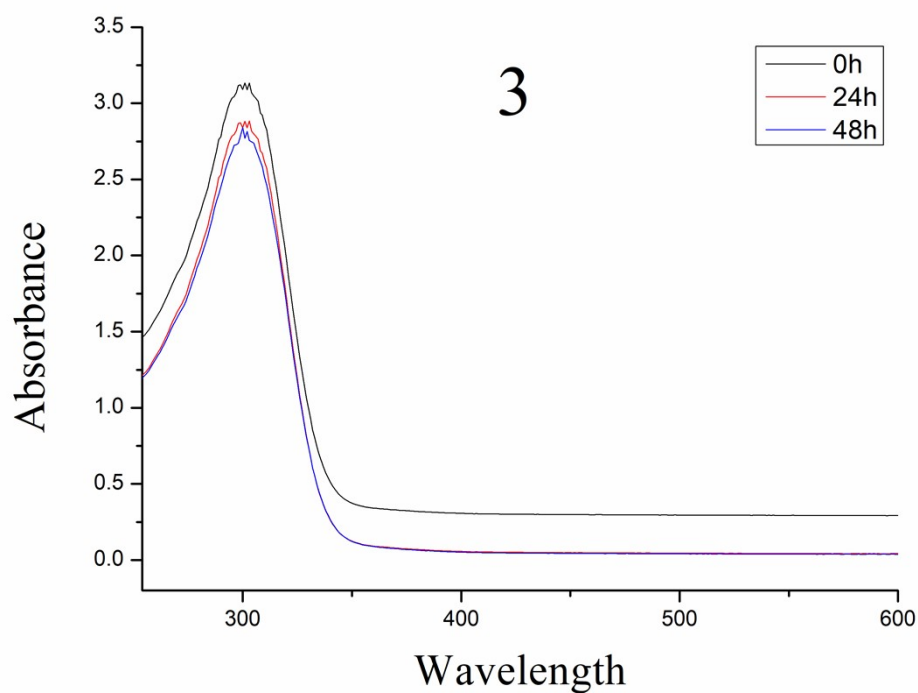

**FigureS3** Ultraviolet spectrum of 1-3 in buffer solution

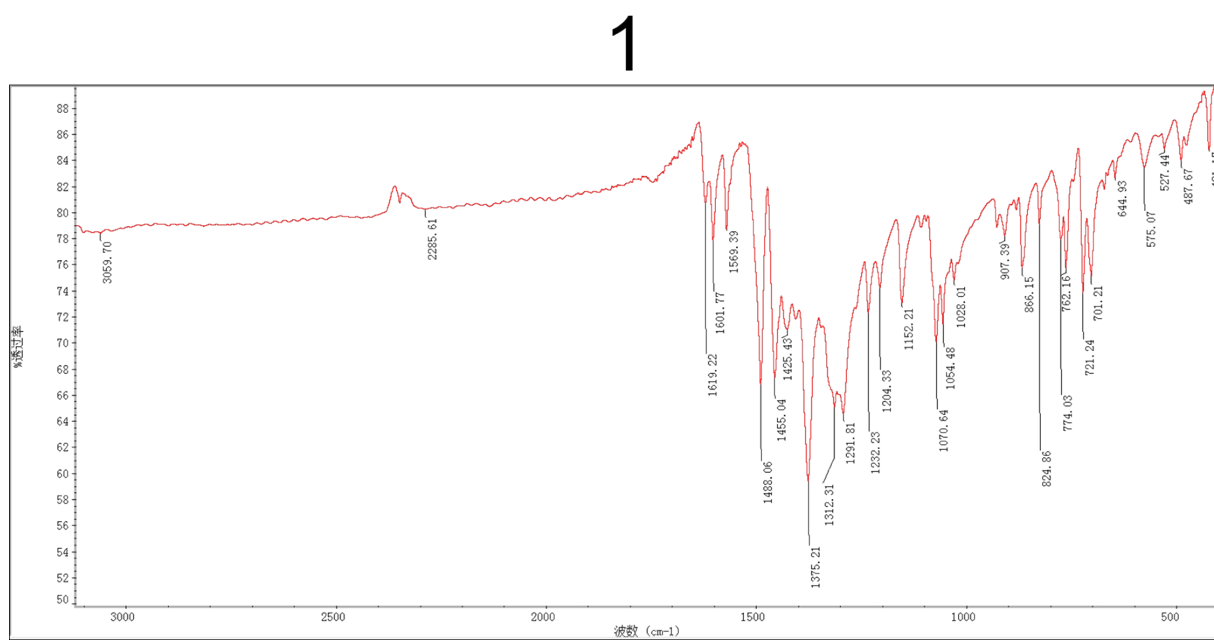

# 2

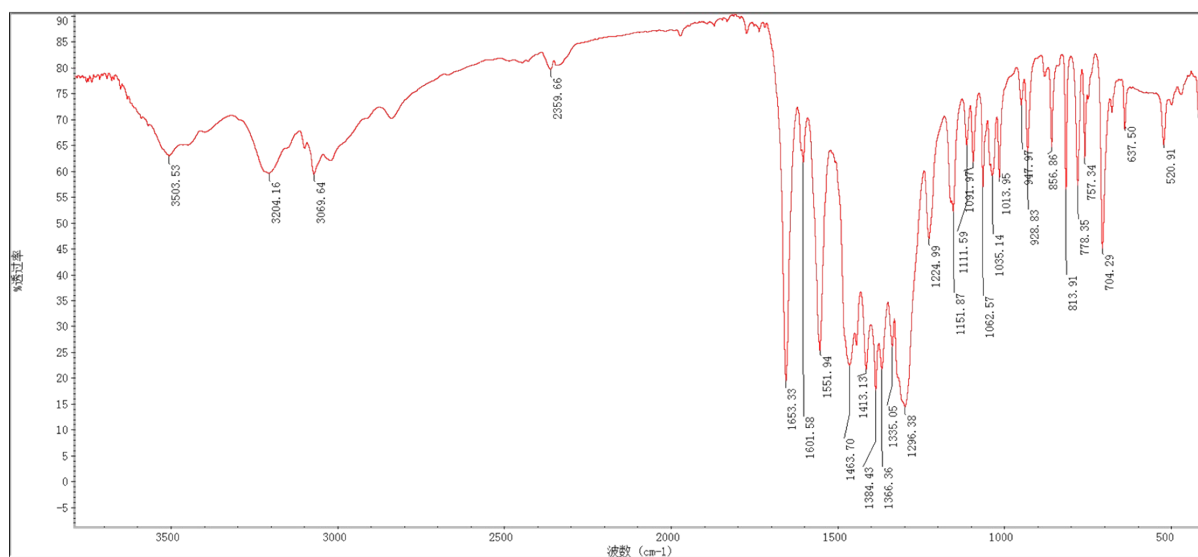

# 3

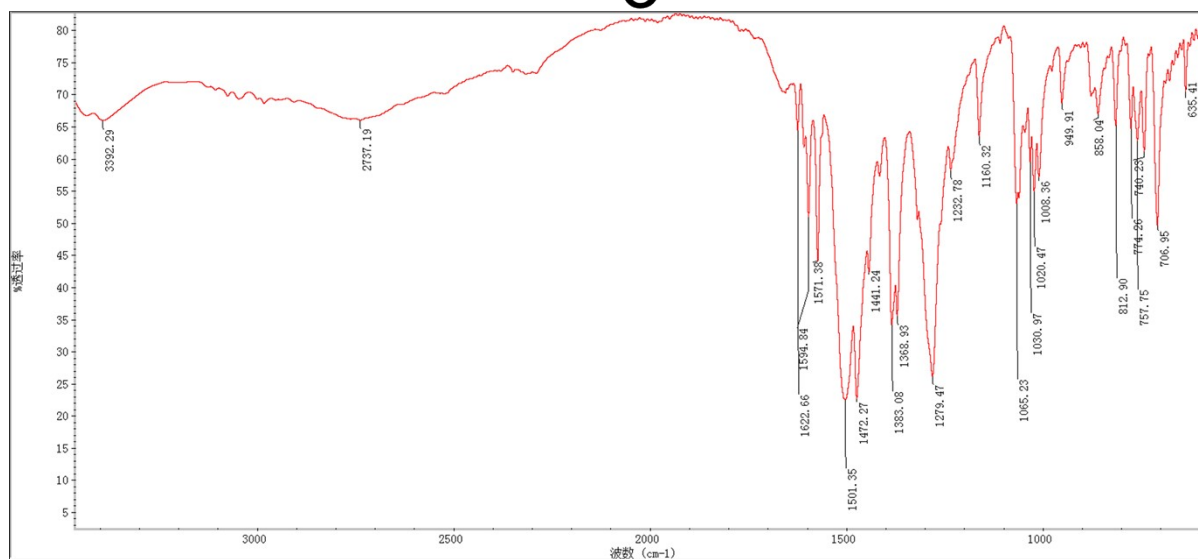

**Figure S4** Infrared spectroscopy of 1-3

### Reference:

- [1] C. Icel, V. T. Yilmaz, S. Aydinlik and M. Aygun, *Dalton Trans.*, 2020, **49**(23), 7842.
- [2] L. H. Abdel-Rahman, A. M. Abu-Dief, R. M. El-Khatib and S. M. Abdel-Fatah, *Bioorg. Chem.*, 2016, **69**, 140.

- [3] N. A. Illán-Cabeza, R. A. Vilaplana, Y. Alvarez, K. Akdi, S. Kamah, F. Hueso-Ureña, M. Quirós, F. González-Vílchez and M. N. Moreno-Carretero, *J. Biol. Inorg. Chem.*, 2005, **10**, 924.
- [4] B. Rogalewicz, A. Climova, E. Pivovarova, J. Sukiennik, K. Czarnecka, P. Szymański, M. Szczesio, K. Gas, M. Sawicki, M. Pitucha and A. Czyłkowska, *Molecules*, 2022, **27**(9), 2703.
- [5] T. A. Yousef, G. M. Abu El-Reash, M. Al-Jahdali and e. El-Rakhawy, *Spectrochim. Acta A Mol. Biomol. Spectrosc.*, 2014, **129**, 163–172.
- [6] C. Shiju, D. Arish and S. Kumaresan, *Arab. J. Chem.*, 2013, **48**, 1759.
- [7] G. G. Liu, S. Y. Wu, W. Liu, G. X. Gao, Y. Zhang, E. J. Gao and M. C. Zhu, *Appl Organomet Chem*, 2021, **35**.
- [8] Q. Y. Yang, Q. Q. Cao, Y. L. Zhang, X. F. Xu, C. X. Deng, R. Kumar, X. M. Zhu, X. J. Wang, H. Liang and Z. F. Chen, *J. Inorg. Biochem.*, 2020, **211**, 111175.
- [9] N. Kordestani, H. Amiri Rudbari, A. R. Fernandes, L. R. Raposo, A. Luz, P. V. Baptista, G. Bruno, R. Scopelliti, Z. Fatemina, N. Micale, N. Tumanov, J. Wouters, A. Abbasi Kajani and A. K. Bordbar, *Dalton Trans.*, 2021, **50**(11), 3990.
- [10] A. Paul, P. Singh, M. L. Kuznetsov, A. Karmakar, M. Guedes da Silva, B. Koch, and A. Pombeiro, *Dalton Trans.*, 2021, **50**(10), 3701.
- [11] M. Liu, X. Q. Song, Y. D. Wu, J. Qian and J. Y. Xu, *Dalton Trans.*, 2020, **49**(1), 114.
- [12] M. Ismael, L. H. Abdel-Rahman, D. Abou El-Ezz, E. A. Ahmed and A. Nafady, *Arch. Pharm.*, 2021, **354**(4), e2000241.
- [13] Y. Sikdar, R. Modak, D. Bose, S. Banerjee, D. Bieńko, W. Zierkiewicz, A. Bieńko, K. Das Saha and S. Goswami, *Dalton Trans.*, 2015, **44**(19), 8876.
